# Supplementary material
Source: publisher figshare collection journal article supplement (https://tandf.figshare.com/articles/dataset/_/7999331)
Supplement: Supplementary file 1 [file 5]

Archive with 3 entries (3 files):
- README.txt
- binaryGP_0.2.tar.gz
- supplementary materials.pdf
