# Supplementary material
Source: publisher figshare collection journal article supplement (https://tandf.figshare.com/articles/dataset/_/7999331)
Supplement: Supplementary file 1 [file 5 › README.txt]

The Supplementary Materials contain two files:
- a supplementary file ("supplementary materials.pdf") containing the assumptions for theorems, the proofs of theorems, and the algorithms for estimation and emulation;
- an R source package file ("binaryGP_0.2.tar"). More up-to-date versions of this package can be found on CRAN.
